# Supplementary material for: Ultra-fast rate capability of a symmetric supercapacitor with a hierarchical Co3O4 nanowire/nanoflower hybrid structure in non-aqueous electrolyte
Source: Royal Society of Chemistry journal article supplement (doi:10.1039/c4ra13327g), 2015-01-01
Supplement: c4ra13327g1.pdf [file c4ra13327g1.pdf]

## Electronic Supplementary Information

### Ultra-fast rate capability of a symmetric supercapacitor with a hierarchical $\text{Co}_3\text{O}_4$ nanowire/nanoflower hybrid structure in non-aqueous electrolyte

N. Padmanathan<sup>a,b</sup> S. Selladurai<sup>b</sup> and Kafil M. Razeeb<sup>a\*</sup>

<sup>a</sup>Tyndall national Institute, University College Cork, Dyeke Parade, Maltings, Cork, Ireland

<sup>b</sup>Ionics Lab, Department of Physics, Anna University, Chennai – 25, India.

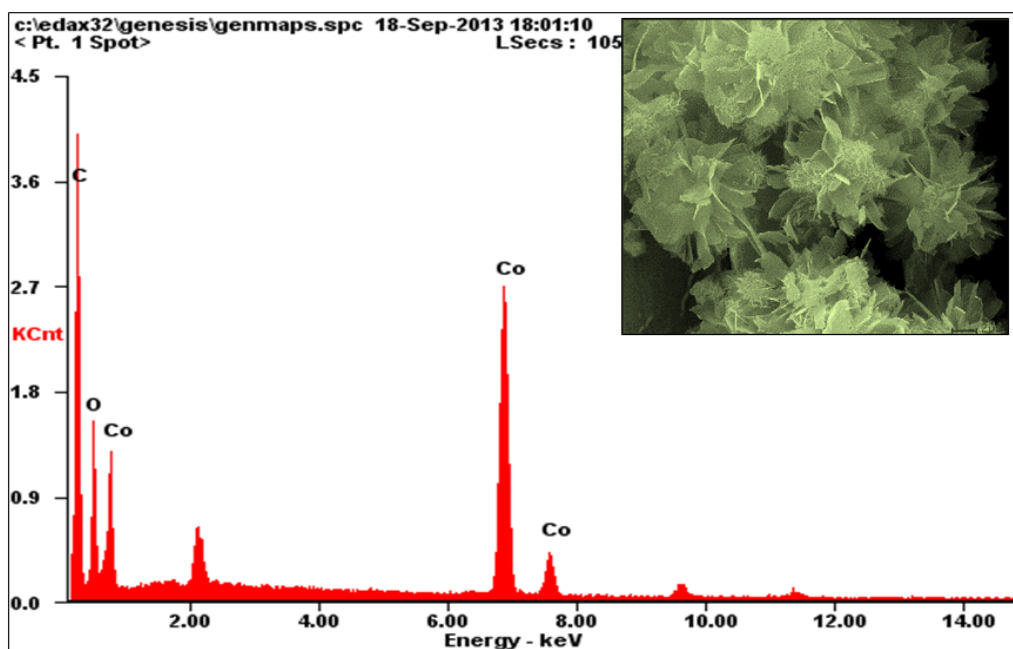

Figure S1. EDS spectrum of  $\text{Co}_3\text{O}_4$  nanoflowers on CFC. Inset shows the SEM image of the nanoflowers with artificial colour.

#### \*Address to Correspondence:

Dr. Kafil M. Razeeb

Nano Interconnection Team, Tyndall National Institute, University College Cork,  
Dyke Parade, Maltings, Cork, Ireland.

Phone: +353 21 4904078, E-mail: [kafil.mahmood@tyndall.ie](mailto:kafil.mahmood@tyndall.ie)

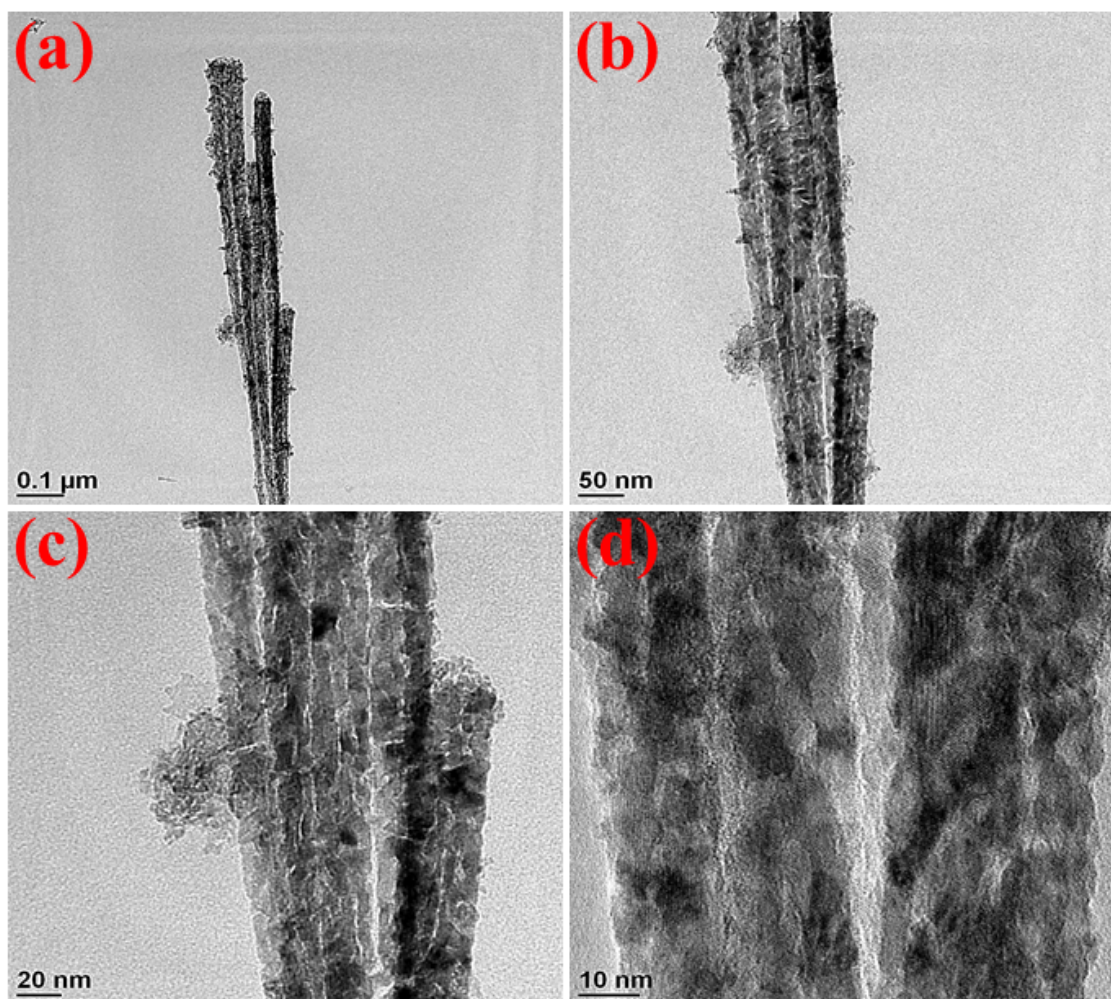

Figure S2. TEM images of  $\text{Co}_3\text{O}_4$  nanowire/nanoflower hybrid structure.

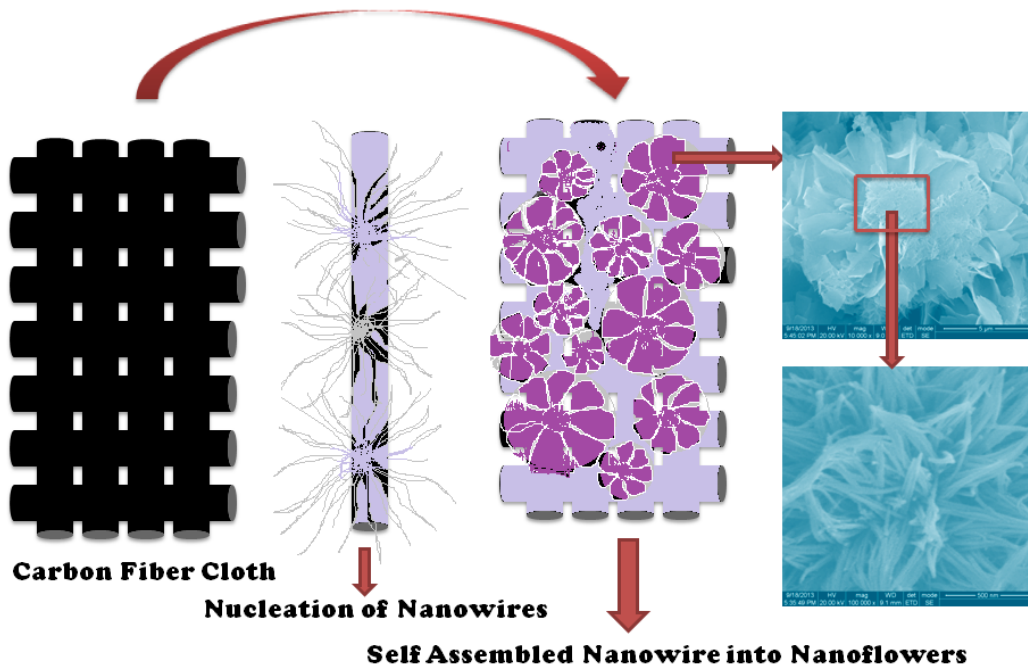

Figure S3. Schematic representation of  $\text{Co}_3\text{O}_4$  nanowire/nanoflower hybrid growth process.

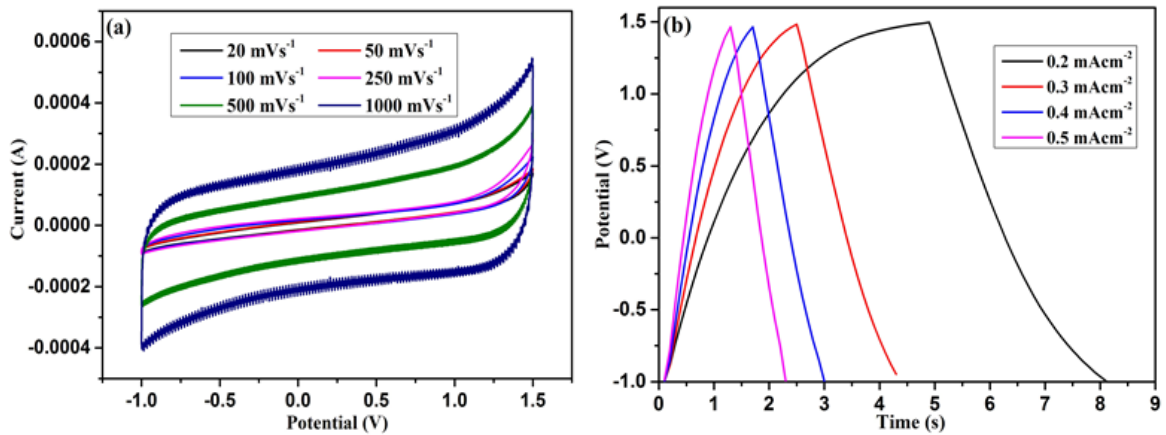

Figure S4. Cyclic voltammogram (a) and Charge/discharge (b) curves of CFC||CFC based symmetric supercapacitor in 1 M TEABF<sub>4</sub>.

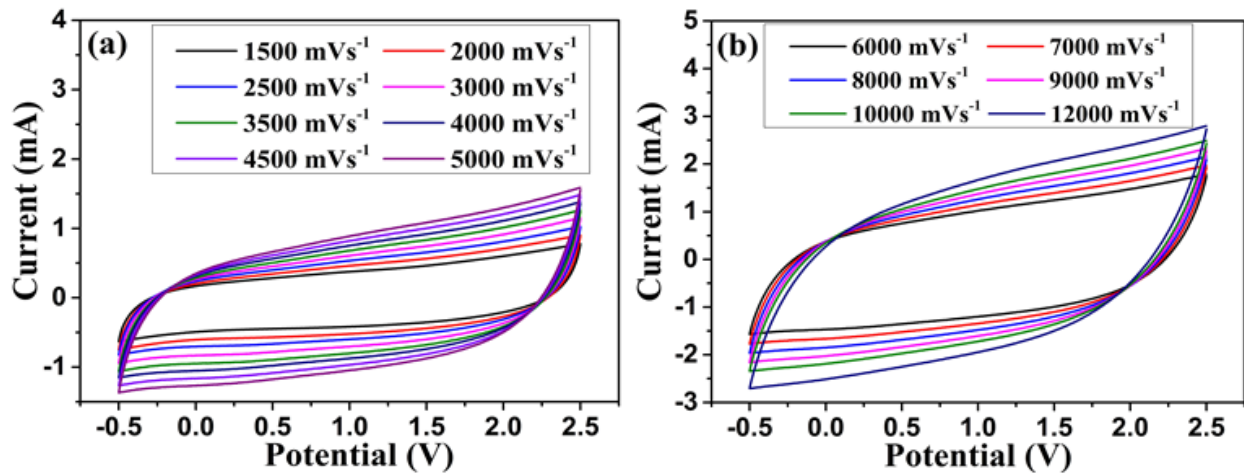

Figure S5. Cyclic voltammogram of  $\text{Co}_3\text{O}_4/\text{CFC}$  based symmetric supercapacitor in 1 M  $\text{TEABF}_4$  at high scan rates.

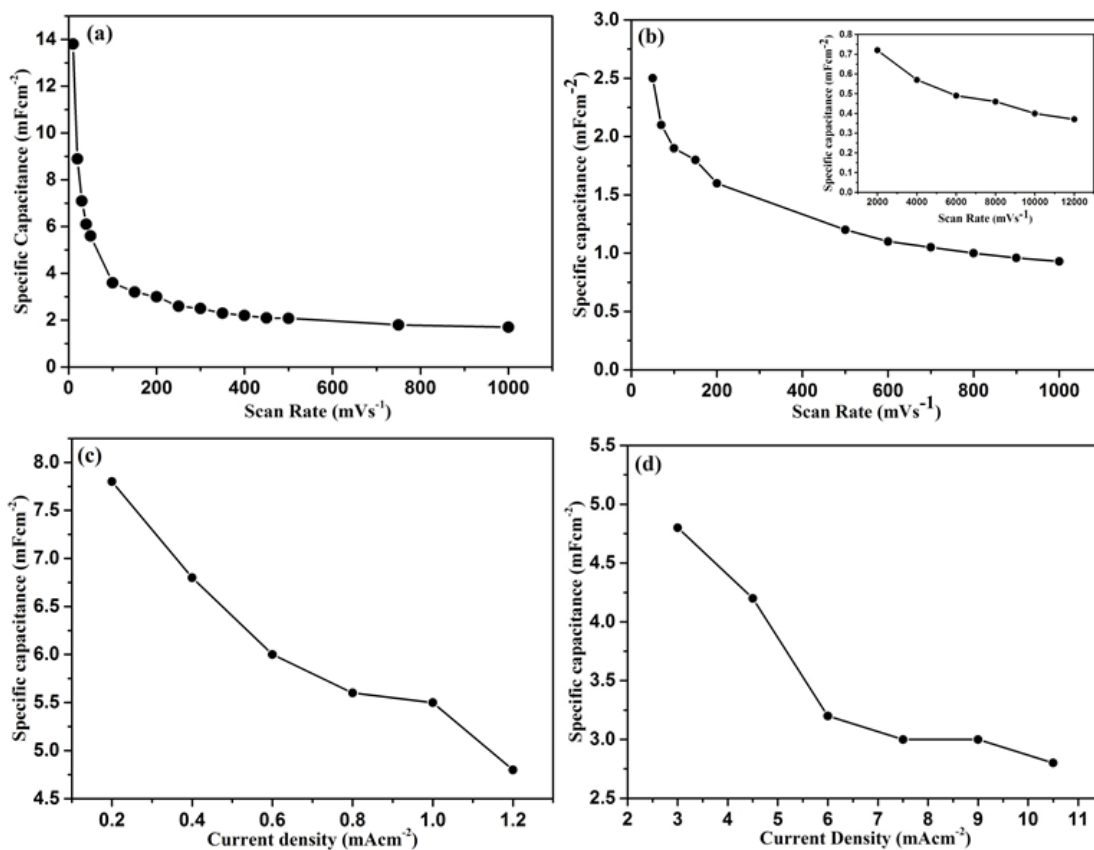

Figure S6. Scan rate and current density dependent specific capacitance of  $\text{Co}_3\text{O}_4/\text{CFC}$  based symmetric supercapacitor in 3 M  $\text{KOH}$  (a and c) and 1 M  $\text{TEABF}_4$  (b and d).

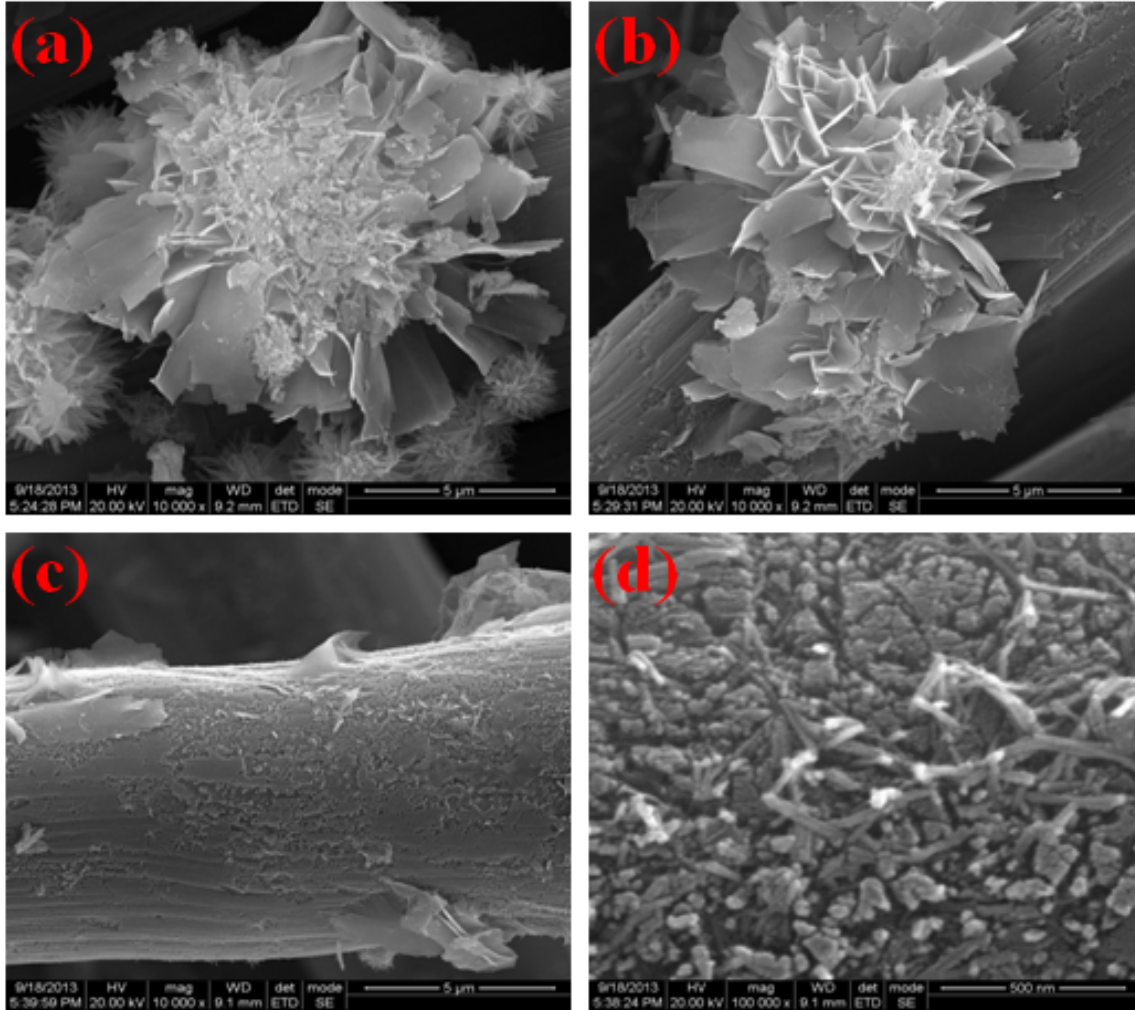

Figure S7. SEM images of  $\text{Co}_3\text{O}_4$  electrode after 5000 cycles in 3 M KOH.

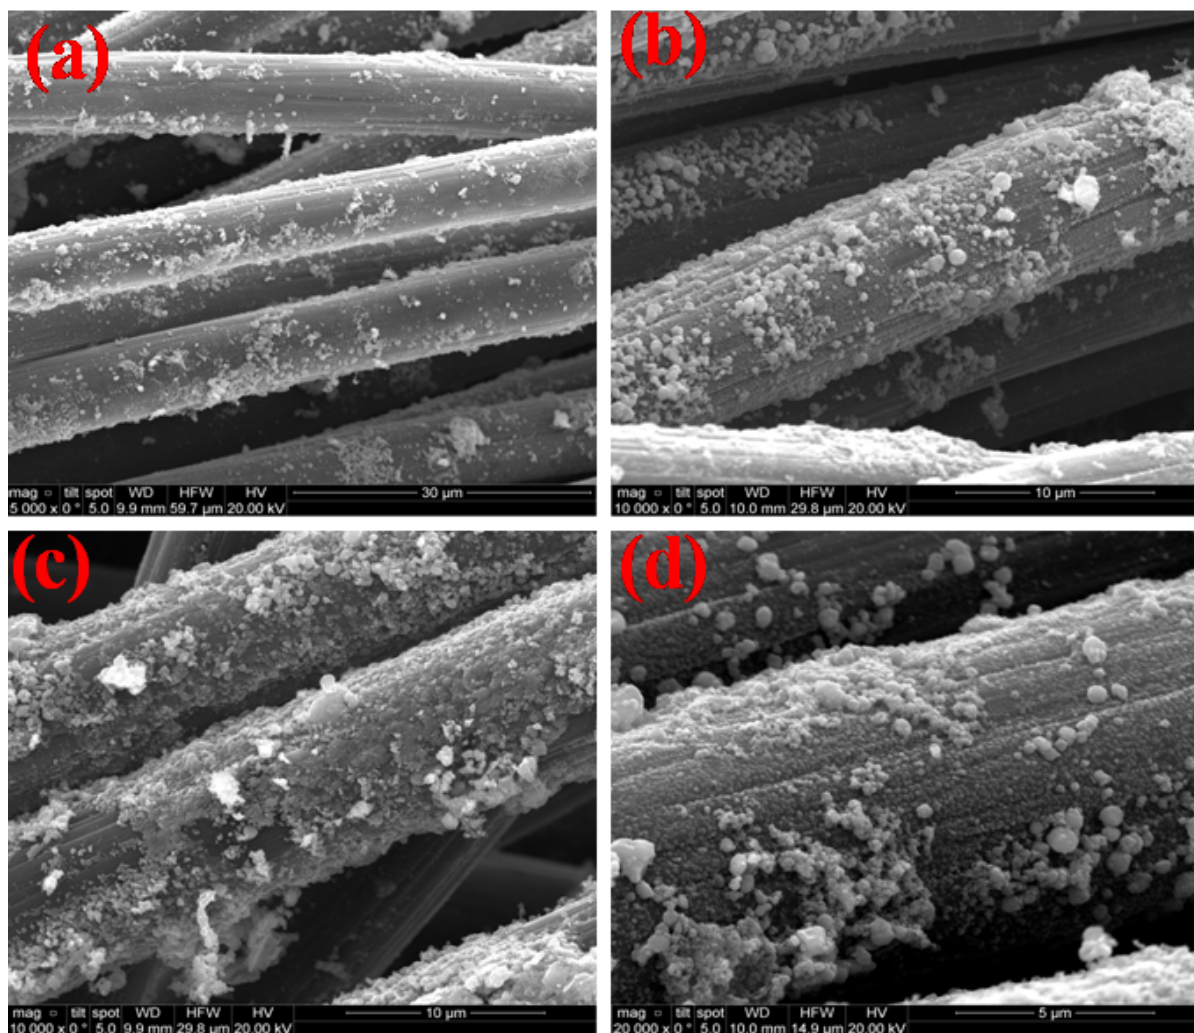

Figure S8. SEM images of  $\text{Co}_3\text{O}_4$  electrode after 10000 cycles in 1 M TEABF<sub>4</sub>.

**Table 1:** Energy and Power performance of  $\text{Co}_3\text{O}_4$  based symmetric supercapacitor in aqueous and non-aqueous electrolytes

| <b><math>\text{Co}_3\text{O}_4</math> based symmetric supercapacitor<br/>in 3 M KOH</b> |                                                    |                                                  | <b><math>\text{Co}_3\text{O}_4</math> based symmetric supercapacitor<br/>in 1 M TEABF<sub>4</sub></b> |                                                    |                                                  |
|-----------------------------------------------------------------------------------------|----------------------------------------------------|--------------------------------------------------|-------------------------------------------------------------------------------------------------------|----------------------------------------------------|--------------------------------------------------|
| <b>Current<br/>Density<br/>(mAcm<sup>-2</sup>)</b>                                      | <b>Energy<br/>Density<br/>(mWhcm<sup>-3</sup>)</b> | <b>Power<br/>density<br/>(mWcm<sup>-3</sup>)</b> | <b>Current<br/>Density<br/>(mAcm<sup>-2</sup>)</b>                                                    | <b>Energy<br/>Density<br/>(mWhcm<sup>-3</sup>)</b> | <b>Power<br/>density<br/>(mWcm<sup>-3</sup>)</b> |
| 0.2                                                                                     | 3.2                                                | 295                                              | 3.0                                                                                                   | 4.2                                                | 1260                                             |
| 0.4                                                                                     | 2.8                                                | 593                                              | 4.5                                                                                                   | 3.6                                                | 1851                                             |
| 0.6                                                                                     | 2.45                                               | 882                                              | 6.0                                                                                                   | 2.75                                               | 2475                                             |
| 0.8                                                                                     | 2.32                                               | 1193                                             | 7.5                                                                                                   | 2.6                                                | 3120                                             |
| 1.0                                                                                     | 2.3                                                | 1505                                             | 9.0                                                                                                   | 2.6                                                | 3744                                             |
| 1.2                                                                                     | 2.0                                                | 1800                                             | 10.5                                                                                                  | 2.4                                                | 4320                                             |
